# Supplementary material
Source: PubMed Central journal article supplement (PMC3121384)
Supplement: supp_M110.156471_jbc.M110.156471-1.pdf [file supp_M110.156471_jbc.M110.156471-1.pdf]

**Supplemental Table 1. PCR primers utilized for mutagenesis**

| <i>Mutation</i>               | <i>PCR Primers (5'-3')</i>                                                                         |
|-------------------------------|----------------------------------------------------------------------------------------------------|
| <i>R33A</i>                   | F: CCATGTTACTGGCTGGTGGACGCGCTGTTGGCCTCTTTCATACC<br>R: GGTATGAAAGAGGCCAACAGCGCGTCCACCAGCCAGTAACATGG |
| <i>R92A</i>                   | F: CCACTGCAGTCTGCCGCCCGCCCTACTCCTACTCC<br>R: GGAGTAGGAGTAGGGCCGGCGGCAGACTGCAGTGG                   |
| <i>R93A</i>                   | F: CACTGCAGTCTGCCCGCGGCCCTACTCCTACTCC<br>R: GGAGTAGGAGTAGGGCGCGCGGCAGACTGCAGTG                     |
| <i>R92A/R93A</i>              | F: TCTCCACTGCAGTCTGCCGCCCGCCCTACTCCTACTCCC<br>R: CGGGAGTAGGAGTAGGGCGCGGCAGACTGCAGTGGAGA            |
| <i>R99A</i>                   | F: CCTACTCCTACTCCGCGCTAGAAGACAAGAAC<br>R: GTTCTTGTCTTCTAGCGCGAGTAGGAGTAGG                          |
| <i>Delete aa45-48</i>         | F: CTTTCATACCCACCACCTATGAGGCAGATGACCCCTGCTGC<br>R: GCAGCAGGGGTTCATCTGCCTCATAGGTGGTGGGTATGAAAG      |
| <i>Delete aa2-81*</i>         | F: GACTCAGATCTCGAGAATGTTTCATCTTCTGGTCTCCAC<br>R: GTGGAGACCAGAAGATGAACATTCTCGAGATCTGAGTC            |
| <i>Delete aa104-123*</i>      | F: CTCCC GGCTAGAAGACAAGGGGATCCACCGCCGGTTCGCC<br>R: GGCGACCGGCCGGTGGATCCCCTTGTCTTCTAGCCGGGAG        |
| <i>Delete aa2-24</i>          | F: GACTCAGATCTCGAGAA TGTTCATGTTACTGGCTGGTG<br>R: CACCAGCCAGTAACATGGGAACATTCTCGAGATCTGAGTC          |
| <i>Delete aa2-59</i>          | F: GACTCAGATCTCGAGAATGACGGTCTTTCACGCCAG<br>R: CTGGCGTGAAGAGGACCGTCATTCTCGAGATCTGAGTC               |
| <i>Delete aa2-67:</i>         | F: GACTCAGATCTCGAGAATGCTGGCTCTGCTTGTGGCTG<br>R: CAGCCACAAGCAGAGCCAGCATTCTCGAGATCTGAGTC             |
| <i>Delete aa2-76</i>          | F: GACTCAGATCTCGAGAATGTTTGCCTTCTCGGGTTCATC<br>R: GATGAACCCGAGAAAGGCAAACATTCTCGAGATCTGAGTC          |
| <i>nSMase2 (aal-40)-GFP *</i> | F: GTTGGCCTCTTTCATACCCGGGATCCACCGGCCG<br>R: CGGCCGGTGGATCCC GGGTATGAAAGAGGCCAAC                    |
| <i>nSMase2 (aal-59)-GFP *</i> | F: CTGCCTGCAGCTGTTCTGCGGGATCCACCGGCCG<br>R: CGGCCGGTGGATCCC GCGAGAACAGCTGCAGGCAG                   |
| <i>Delete aa12-123</i>        | F: ACGACCCCTTTTCCTAATAGCTTTTGTCTCGCCACGGCCAATG<br>R: CATTGGCCGTGGCGAAGCAAAGCTATTAGGAAAGGGGGTTCGT   |

\* Vector *nSMase2(1-123)-GFP* was used as PCR template for these mutagenesis experiments.

“F” and “R” refer to the forward and reverse primers, respectively.

**A**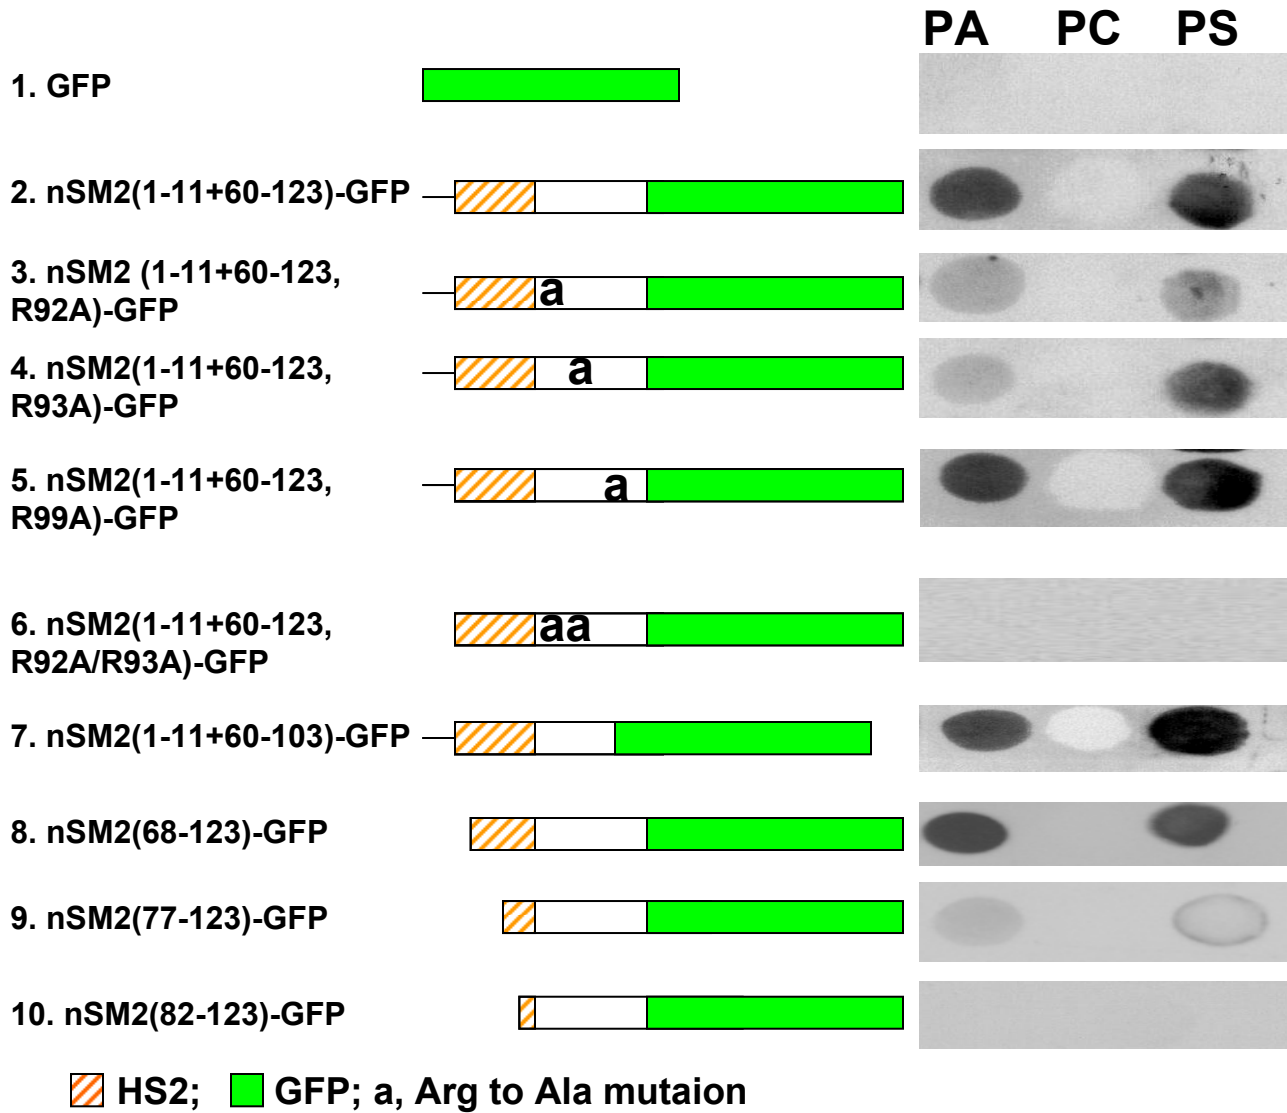**B**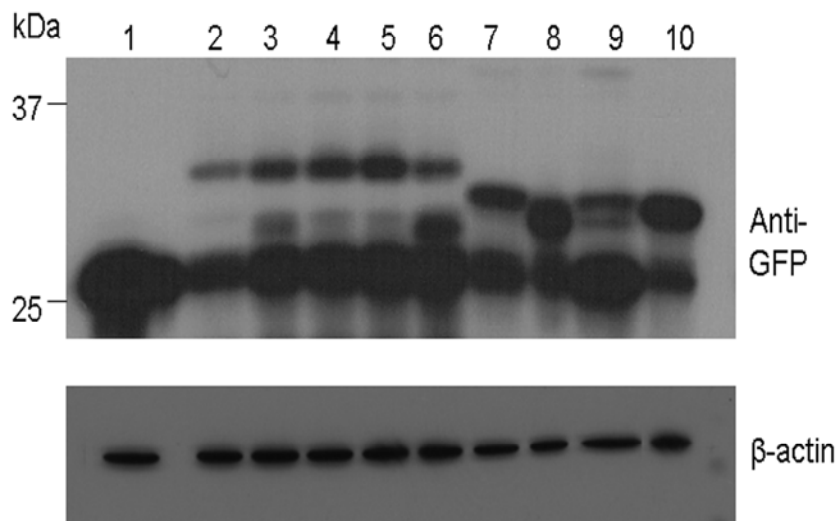

Supplemental Figure 1

C

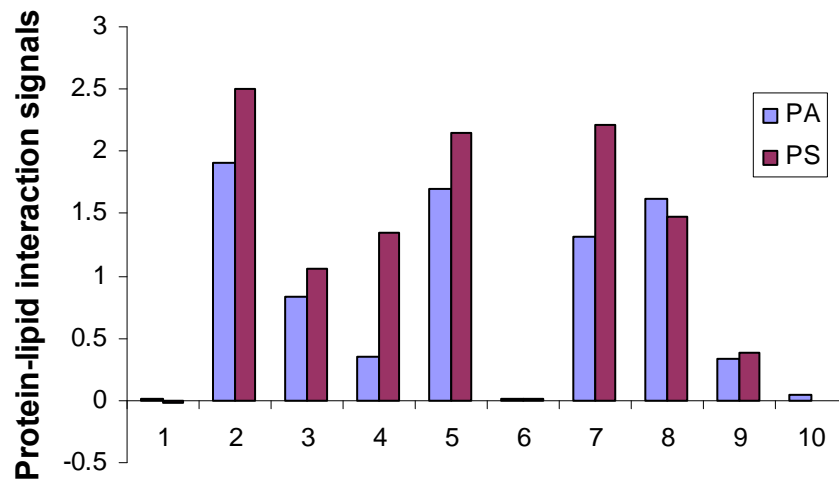

**Supplemental Figure 1. Identification of the second APL binding domain in the N-terminus of nSMase2.** *A*, a series of GFP-tagged deletion or point mutants were generated from mutant nSMase2(aa1-123/ $\Delta$  12-59)-GFP (which contains the second HS) and overexpressed in HEK293 cells. The cell lysates were subjected to lipid-protein overlay assays. *B*, immunoblot analysis of expression of deletion mutants of nSMase2 with anti-GFP antibody. *C*, densitometry analyses were performed using ImageQuant TL software (GE health care). The relative value of each lipid-protein interaction signal was calculated by subtracting the background and normalized to its western signals from the upper band (the correct sized band). Similar results were obtained in two separate experiments.

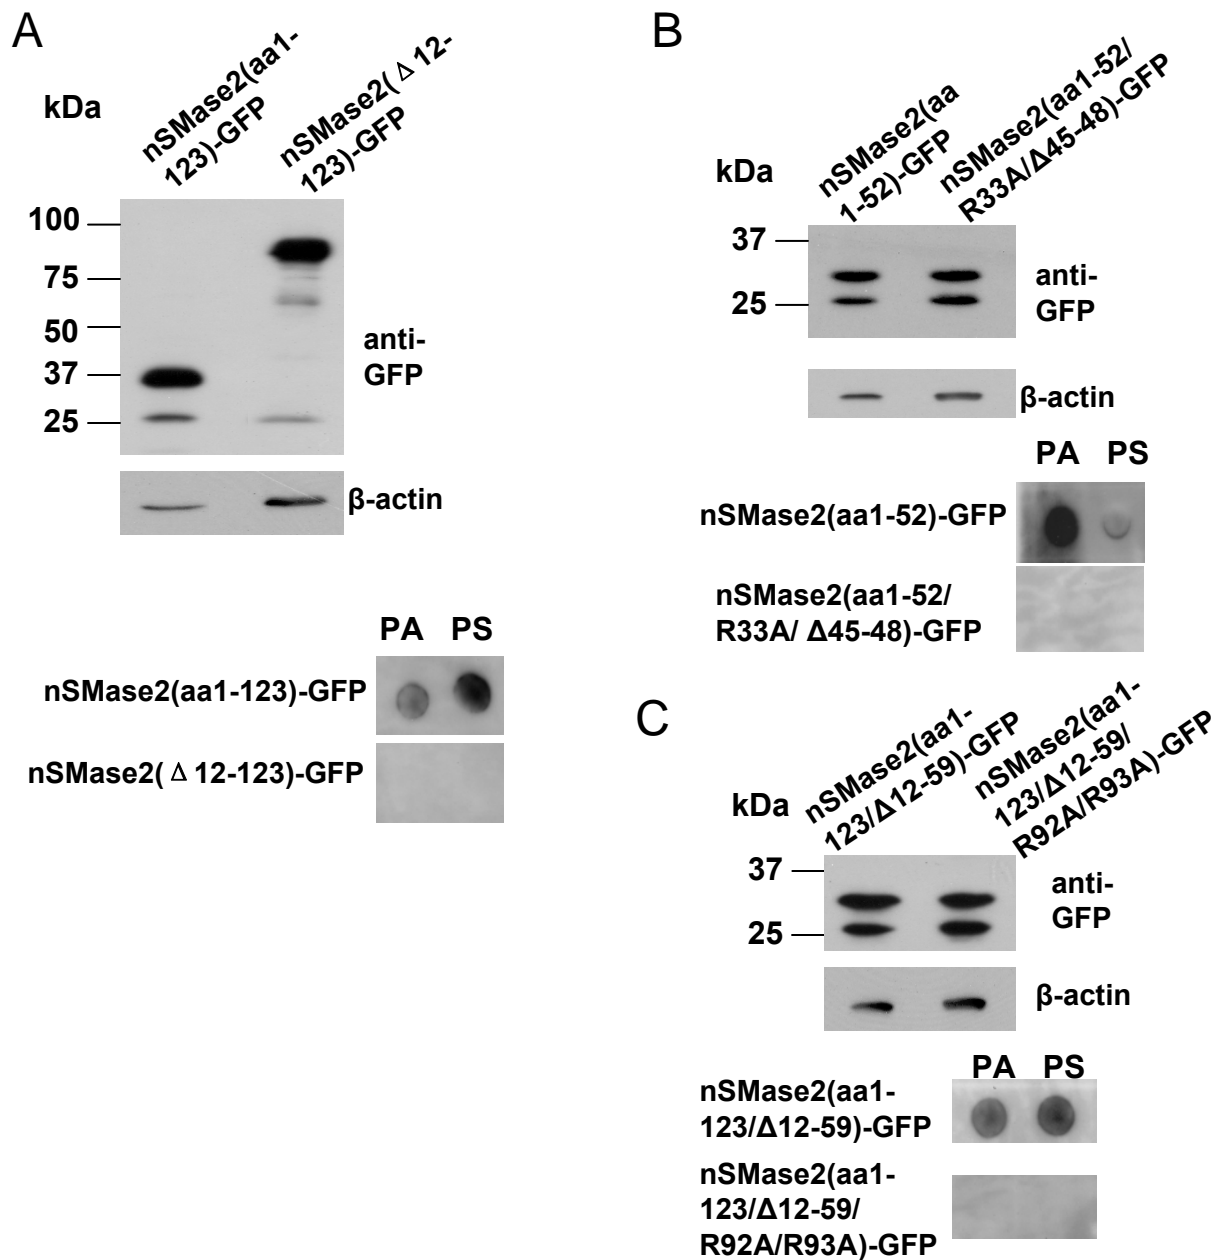

**Supplemental Figure 2. Comparison of lipid-protein interaction using similar amount of mutant nSMase2-GFP protein.** HEK293 cells were transfected using vector with nSMase2-GFP mutants. Different amount for protein lysates were used for western blot analysis for acquiring similar level of mutant nSMase2 protein (the upper band on Western blot results). The cell lysates were then used for lipid-protein overlay assays. *A*, 10  $\mu$ g nSMase2(aa1-123)-GFP and 50  $\mu$ g of nSMase2( $\Delta$ 12-123)-GFP cell lysates were used for western blot analysis (upper panel). 10 $\mu$ g/ml nSMase2(1-123)-GFP and 50  $\mu$ g/ml of nSMase2( $\Delta$ 12-123)-GFP cell lysates were used for lipid-protein overlay assays (lower panel). *B*, 10  $\mu$ g nSMase2(aa1-52)-GFP and 25  $\mu$ g nSMase2(1-52/R33A/ $\Delta$ 45-48)-GFP cell lysates were used for western blot analysis (upper panel). 10 $\mu$ g/ml nSMase2(1-52)-GFP and 25  $\mu$ g/ml of nSMase2(aa1-52/R33A/ $\Delta$ 45-48)-GFP cell lysates were used for lipid-protein overlay assays (lower panel). *C*, 10 $\mu$ g nSMase2(aa1-123/ $\Delta$ 12-59)-GFP and 25  $\mu$ g nSMase2(aa1-123/ $\Delta$ 12-59/R92A/R93A)-GFP cell lysates were used for western blot analysis (upper panel). 10 $\mu$ g/ml nSMase2(aa1-123/ $\Delta$ 12-59)-GFP and 25  $\mu$ g/ml nSMase2(aa1-123/ $\Delta$ 12-59/R92A/R93A)-GFP cell lysates were used for lipid-protein overlay assays (lower panel). Similar results were obtained in two separate experiments.

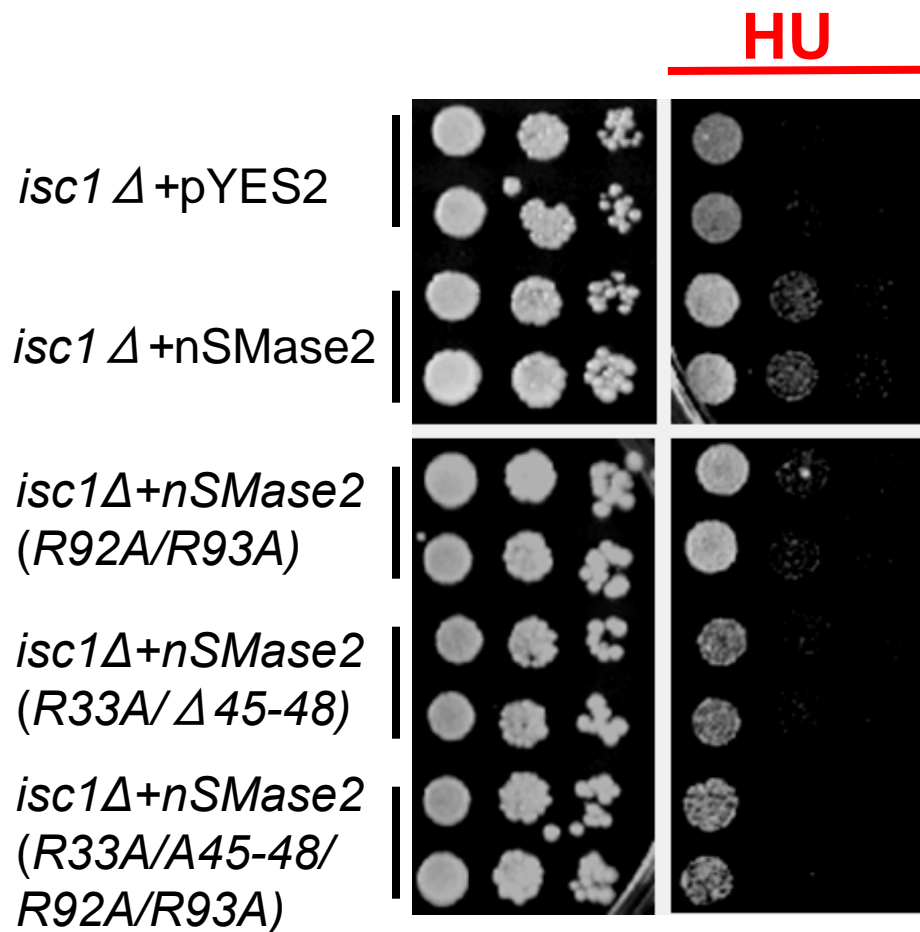

**Supplemental Figure 3. Effects of nSMase2 and APL binding domain mutants on rescuing the defect of *isc1*Δ *S. cerevisiae* cells.** Different vectors, including pYES2 control, wildtype nSMase2-pYES2 or various nSMase2-pYES2 mutants, were transformed and expressed in *isc1*Δ *S. cerevisiae* cells, respectively. Exponentially growing cells were first diluted to an A600 of 0.3, and then serially diluted and spotted onto agar Raf/Galactose uracil minus plates with or without 10 mg/ml hydroxyurea (HU). The plates were incubated for 3-4 days at 30°C. This experiment was performed two times with similar results.

# A

|            |            |            |             |             |            |       |
|------------|------------|------------|-------------|-------------|------------|-------|
|            | 1          |            |             |             |            | 50    |
| Cf_nSMase2 | MVLYTAPFPN | SCLSALHAVS | WALLFPCYWL  | ADRLVASFIP  | TTYEKQRAD  |       |
| Am_nSMase2 | MVLYTAPFPN | SCLSALHAVS | WALLFPCYWL  | ADRLVASFLP  | TTYEKQRAD  |       |
| Bt_nSMase2 | MVLYTTPFPN | SCLSALHAVS | WALIFPCYWL  | ADRLLASFIP  | TTYEKQRAD  |       |
| Mm_nSMase2 | MVLYTTPFPN | SCLSALHAVS | WALIFPCYWL  | VDRLLASFIP  | TTYEKQRAD  |       |
| Rn_nSMase2 | MVLYTTPFPN | SCLSALHAVS | WALIFPCYWL  | VDRLVASFIP  | TTYEKQRAD  |       |
| Pt_nSMase2 | MVLYTTPFPN | SCLSALHCVS | WALIFPCYWL  | VDRLAASFIP  | TTYEKQRAD  |       |
| Hs_nSMase2 | MVLYTTPFPN | SCLSALHCVS | WALIFPCYWL  | VDRLAASFIP  | TTYEKQRAD  |       |
| Cj_nSMase2 | MVLYTTPFPN | SCLSALHCVS | WALIFPCYWL  | VDRLAASFIP  | TTYEKQRAD  |       |
| Oc_nSMase2 | MVLYTTPFPT | SCLSALHAVS | WALIFPCYWL  | VDRLAASFRP  | TTYEKQRAD  |       |
| Xl_nSMase2 | MVLYTTPFPS | SFLSSLHSL  | WALIFPCYWL  | GDRLLASFLP  | TTYEKQRSD  |       |
| Gg_nSMase2 | MVLYTSPFPN | SFLSVLHSFS | WGLIFPCYWF  | ADRLVASFVP  | TTYEKQRAD  |       |
| Dr_nSMase2 | MVLHTSPYPS | AFLSFLSGLS | WAFVFPYWL   | LDRLLASCV   | TSLEKRRRSQ |       |
| Consensus  | MVL-T-P-P- | --LS-L---- | W----FPCYW- | -DRL-AS---  | T--EKR-R-  |       |
|            |            |            | FPCYWX      | XDRLXASXXX  | TXXEKRXR   |       |
|            |            |            | nSM2-APLB1  |             |            |       |
|            | 51         |            |             |             |            | 100   |
| Cf_nSMase2 | DPCYLQLLCT | VLFTPVIYAL | LVASLPFAFV  | GFLWSPLOQ   | ARRPYIYSR. |       |
| Am_nSMase2 | DPCYLQLLCT | LLFTPVIYAL | LVASLPFAFV  | GFLWSPLOQ   | ARRPYIYSR. |       |
| Bt_nSMase2 | DPCYLQLLCT | VLFTPVIYAL | LVASLPFAFL  | GFLWSPLOQ   | ARRPYVYSR. |       |
| Mm_nSMase2 | DPCCLQLFCT | VLFTPVIYAL | LVAALPFAFL  | GFIFWSPLOQ  | ARRPYSYSR. |       |
| Rn_nSMase2 | DPCYLQLFCT | VLFTPVIYAL | LVAALPFAFL  | GFIFWSPLOQ  | ARRPYSYSR. |       |
| Pt_nSMase2 | DPCCLQLLCT | ALFTPVIYAL | LVASLPFAFL  | GFLWSPLOQ   | ARRPYIYSR. |       |
| Hs_nSMase2 | DPCCLQLLCT | ALFTPVIYAL | LVASLPFAFL  | GFLWSPLOQ   | ARRPYIYSR. |       |
| Cj_nSMase2 | DPCCLQLLCT | ALFTPVIYAL | LVASLPFAFL  | GFLWSPLOQ   | ARRPYIYSR. |       |
| Oc_nSMase2 | DPCCLQLLCT | VLFTPVIYAL | LVAALPFAFL  | GFLWSPLOQ   | VRRPYVYSR. |       |
| Xl_nSMase2 | DPCYFQALCI | IITTPVIYAL | LVSSLPFAFI  | GFLVWSP IQA | ARRPYVYSH. |       |
| Gg_nSMase2 | DPCYFHALCI | IITTPVIYAL | LVASLPFALI  | GFLWSPLOQ   | ARRPYIYSR. |       |
| Dr_nSMase2 | DPCSFLALGV | LISTPLYLVL | LLASLPFAFI  | GFLWAPLOQ   | IRKPYIYSHQ |       |
| Consensus  | DPC-----   | ---TP-YL-L | L---LPFA--  | GF--W-P-Q-  | -R-PY-YS-- |       |
|            |            |            | LXL         | LXXXLPFAXX  | GFXXWXPXQX | XRR/K |
|            |            |            | nSM2-APLB2  |             |            |       |
|            | 101        |            |             |             |            | 150   |
| Cf_nSMase2 | .....LEDQ  | GSASGAALLS | EWKGTGPGKS  | FCFATANLCL  | LPDSLARLNN |       |
| Am_nSMase2 | .....LEDK  | GPAGGAALLS | EWKGTGPGKS  | FCFATANLCL  | LPDSLARLNN |       |
| Bt_nSMase2 | .....LEDK  | GPTGGAALLS | EWKGTGPGKS  | FCFATANLCL  | LPDSLARLNN |       |
| Mm_nSMase2 | .....LEDK  | NPAGGAALLS | EWKGTGAGKS  | FCFATANVCL  | LPDSLARLNN |       |
| Rn_nSMase2 | .....LEDK  | SPAGGAALLS | EWKGTGAGKS  | FCFATANVCL  | LPDSLARLNN |       |
| Pt_nSMase2 | .....LEDK  | GLAGGAALLS | EWKGTGPGKS  | FCFATANVCL  | LPDSLARVNN |       |
| Hs_nSMase2 | .....LEDK  | GLAGGAALLS | EWKGTGPGKS  | FCFATANVCL  | LPDSLARVNN |       |
| Cj_nSMase2 | .....LEDK  | GLASGAALLS | EWKGTGPGKS  | FCFATANVCL  | LPDSLARVNN |       |
| Oc_nSMase2 | .....LGDK  | GAAGGAALLG | EWKGTGTGKS  | FCFATANLCL  | LPDSLARLNN |       |
| Xl_nSMase2 | .....IQEK  | ARATEAKLLA | EWRATSSGKS  | FCFGTANVCL  | LPDSIARFNN |       |
| Gg_nSMase2 | .....LQDK  | SHANGAALLS | EWKAAGNGKS  | FCFGSANVCL  | LPDSLARFNN |       |
| Dr_nSMase2 | KPDKHGVEQG | SAAGTGAALA | EWRP..QGRS  | FCFGSANVCL  | LPDSLARFNN |       |
| Consensus  | -----      | -----L-    | EW-----G-S  | FCF--AN-CL  | LPDS-AR-NN |       |

Supplemental figure 4A

|            |            |            |            |            |            |     |
|------------|------------|------------|------------|------------|------------|-----|
|            | 151        |            |            |            |            | 200 |
| Cf_nSMase2 | VFNTQARARE | IGQRIRNGAS | RPQIKIYIDS | PTNTSISAAS | FSSLVSPQGS |     |
| Am_nSMase2 | VFNTQARAKE | IGQRIRNGAS | RPQIKIYIDS | PTNTSISAAS | FSSLVSPQGS |     |
| Bt_nSMase2 | VFNTQARAKE | IGQRIRNGAS | RPQIKIYIDS | PTNTSISAAS | FSSLVSPQGS |     |
| Mm_nSMase2 | VFNTQARAKE | IGQRIRNGAA | RPQIKIYIDS | PTNTSISAAS | FSSLVSPQGG |     |
| Rn_nSMase2 | VFNTQARAKE | IGQRIRNGAA | RPQIKIYIDS | PTNTSISAAS | FSSLVSPQGS |     |
| Pt_nSMase2 | LFNTQARAKE | IGQRIRNGAA | RPQIKIYIDS | PTNTSISAAS | FSSLVSPQGG |     |
| Hs_nSMase2 | LFNTQARAKE | IGQRIRNGAA | RPQIKIYIDS | PTNTSISAAS | FSSLVSPQGG |     |
| Cj_nSMase2 | LFNTQARAKE | IGQRIRNGAA | RPQIKIYIDS | PTNTSISAAS | FSSLVSPQGG |     |
| Oc_nSMase2 | LFNTQARAKE | IGQRIRNGAA | RPQIKIYIDS | PTNTSISAAS | FSSLVSPQGG |     |
| Xl_nSMase2 | LFNTQARAKE | IGRRIRNGAS | RPQIKIYIDS | PTNTSISAAS | FSSLVSPQGG |     |
| Gg_nSMase2 | VFNTQARAKE | IGRRIRNGAS | RPQIKIYIDS | PTNTSISAAS | FSSLVSPQGG |     |
| Dr_nSMase2 | LADTQRRARE | VGKRIRNGAS | RPQIKIYIDS | PTNTSISAVS | FCSL.STQG. |     |
| Consensus  | ---TQ-RA-E | -G-RIRNGA- | RPQIKIYIDS | PTNTSISA-S | F-SL-S-QG- |     |

|            |            |            |            |            |            |     |
|------------|------------|------------|------------|------------|------------|-----|
|            | 201        |            |            |            |            | 250 |
| Cf_nSMase2 | DGVARAVPGS | IKRTASVEYK | GD.GGRHPSE | EAA.....   | .NGPA.SGDP |     |
| Am_nSMase2 | DGVARAVPGS | IKRTASVEYK | GD.GGRHPSD | EAA.....   | .NGLA.SGDP |     |
| Bt_nSMase2 | DGVPRAVPGS | IKRTASVEYK | GD.GGRHPSD | EAA.....   | .NGLA.SGDP |     |
| Mm_nSMase2 | DG.SRAVPGS | IKRTASVEYK | GD.GGRHPSD | EAA.....   | .NGPA.SGEQ |     |
| Rn_nSMase2 | DG.ARAVPGS | IKRTASVEYK | GD.GGRHPSD | EAA.....   | .NGPA.SGEQ |     |
| Pt_nSMase2 | DGVARAVPGS | IKRTASVEYK | GD.GGRHPGD | EAA.....   | .NGPA.SGDP |     |
| Hs_nSMase2 | DGVARAVPGS | IKRTASVEYK | GD.GGRHPGD | EAA.....   | .NGPA.SGDP |     |
| Cj_nSMase2 | DGVARAVSGS | IKRTASVEYK | GD.GGRHPSE | EAA.....   | .NGPA.SGDP |     |
| Oc_nSMase2 | DGGARVVPGS | IKRTASVEYK | GD.GGRH.GD | EAA.....   | .NGPA.PADP |     |
| Xl_nSMase2 | DTSHRAVNVG | MKRTTSMEYK | GENSGENSSE | ENR.....   | .DGRNG.GDT |     |
| Gg_nSMase2 | DSTNRTVNAG | MKRTTSMEYK | GDNSGSNNSE | DGR.....   | .DDKAGSGEL |     |
| Dr_nSMase2 | .....      | FRRTSSLDHR | PDPVVTTENE | TEALTECPIH | TSGGTSSDCP |     |
| Consensus  | -----      | --RT-S---- | -----      | -----      | -----      |     |

|            |            |            |            |            |            |     |
|------------|------------|------------|------------|------------|------------|-----|
|            | 251        |            |            |            |            | 300 |
| Cf_nSMase2 | AEGVGLEDA. | .CIVRIGGEE | GG.....RP  | PEADDPAAGG | QTRNGA.... |     |
| Am_nSMase2 | AEGGSLEDA. | .CIVRIGGDE | GG.....RP  | PEADDATAGG | QARNGA.... |     |
| Bt_nSMase2 | ADGGNLEDA. | .CIVRISGDE | GG.....RP  | PEAGDPANGG | QARNGA.... |     |
| Mm_nSMase2 | ADGSL.EDS. | .CIVRIGGEE | GG.....RP  | QEADDPAAGS | QARNGA.... |     |
| Rn_nSMase2 | ADGSL.EDS. | .CIVRIGGEE | GG.....RA  | QEADDPAPGS | QARNGA.... |     |
| Pt_nSMase2 | VDSSSPEDA. | .CIVRISGEE | GG.....RP  | PEADDPAPGG | QARNGA.... |     |
| Hs_nSMase2 | VDSSSPEDA. | .CIVRIGGEE | GG.....RP  | PEADDPVPGG | QARNGA.... |     |
| Cj_nSMase2 | ADGSSPEDS. | .CIVRISGEE | GG.....RP  | PEAEDPAPGG | QARNGA.... |     |
| Oc_nSMase2 | TDGGGLEET. | .CIVRIGGEE | GG.....RP  | PEADDPAPGS | QARNGA.... |     |
| Xl_nSMase2 | ADGE..DCP. | .CIIRISGED | SG.....HI  | SDTETDAISG | HVNVACLAE. |     |
| Gg_nSMase2 | NEGE..ENT. | .CIVRINGED | NG.....HV  | SDIETDVVNG | QANASGTAEH |     |
| Dr_nSMase2 | IHSTGVQNSS | ECPLHPNEEE | HAPDCAMHQS | SDSECPVHSN | IMQNSEDCPL |     |
| Consensus  | -----      | -C-----    | -----      | -----      | -----      |     |

Supplemental figure 4A (cont'd)

|            |            |            |            |             |             |
|------------|------------|------------|------------|-------------|-------------|
|            | 301        |            |            |             | 350         |
| Cf_nSMase2 | ...G.....G | SP.....QGQ | TPNHSQRDGD | SGSLGSPSAS  | RESLVKTRAA  |
| Am_nSMase2 | ...G.....G | AP.....QGQ | TPNHSQRDGD | SGSLGSPSAS  | RESLVKVRRAA |
| Bt_nSMase2 | ...G.....G | GP.....RGQ | TPNHSQQDGD | SGSLGSPSAS  | RESLVKGRSG  |
| Mm_nSMase2 | ...G.....G | TP.....KGQ | TPNHNQRDGD | SGSLGSPSAS  | RESLVKARAG  |
| Rn_nSMase2 | ...G.....G | TP.....KGQ | TPNHNQRDGD | SGSLGSPSAS  | RESLVKARAG  |
| Pt_nSMase2 | ...G.....G | GP.....RGQ | TPNHNQQDGD | SGSLGSPSAS  | RESLVKGRAG  |
| Hs_nSMase2 | ...G.....G | GP.....RGQ | TPNHNQQDGD | SGSLGSPSAS  | RESLVKGRAG  |
| Cj_nSMase2 | ...G.....R | GP.....RGQ | TPNHNQRDGD | SGSLGSPSAS  | RESLVKGRAG  |
| Oc_nSMase2 | ...G.....G | GP.....RGQ | TPNHSQRDGD | SGSLGSPSAS  | RESLVKARAG  |
| Xl_nSMase2 | .IEP.....D | FQ.....KSP | TANHKNKDAD | GGSLDSYTAS  | RESLVKVRMA  |
| Gg_nSMase2 | SLEG.....D | TE.....ISK | TPNHKQKDGD | SGSLDSYSAS  | RESLVKVRVG  |
| Dr_nSMase2 | HPSGVQISIT | SPDSEPAEAE | KGNHQTGDGD | TGSLDSRTAS  | RESLVRFHAA  |
| Consensus  | -----      | -----      | --NH---D-D | -GSL-S--AS  | RESLV-----  |
|            | 351        |            |            |             | 400         |
| Cf_nSMase2 | AD.GGGSGEP | GATNSKFPYK | ASGVKKAAR  | RRRHPDEAFD  | HEVSAFFPAN  |
| Am_nSMase2 | AD.SGGSGEP | GATNSKLPYK | ASGVKKAAR  | KRRHPDEAFD  | HEVSAFFPAN  |
| Bt_nSMase2 | AD..GGSGEP | GA.NSKLPYK | ASVVKKAAMR | RRRHPDEAFD  | HEVSAFFPAN  |
| Mm_nSMase2 | QD.SGGSGEP | GA.NSKLLYK | TSVVKKAAR  | RRRHPDEAFD  | HEVSAFFPAN  |
| Rn_nSMase2 | QD.SGGSGEP | GS.NSKLLYK | TSVVKKAAR  | RRRHPDEAFD  | HEVSAFFPAN  |
| Pt_nSMase2 | PD.TSASGEP | GA.NSKLLYK | ASVVKKAAR  | RRRHPDEAFD  | HEVSAFFPAN  |
| Hs_nSMase2 | PD.TSASGEP | GA.NSKLLYK | ASVVKKAAR  | RRRHPDEAFD  | HEVSAFFPAN  |
| Cj_nSMase2 | PD.AGAGGEP | GA.NSKLLYR | ASMVKKAAR  | RRRHPDEAFD  | HEVSAFFPAN  |
| Oc_nSMase2 | PDGSSGSTEP | GS.NSKLLYK | ASVVKKAATR | RRRHPDEAFD  | YEVSAFFPAN  |
| Xl_nSMase2 | ....DGAADQ | SSINTKLLHK | TSIIKKATAR | KKKHTDDILD  | HEISAFFPAN  |
| Gg_nSMase2 | ....DGTVDQ | STVNNKLLYK | ASIMKTSVR  | KKKHTDETFD  | HEISAFFPAN  |
| Dr_nSMase2 | ....DGGISP | N..NTLSQHR | TSVFKRPIGR | KRRHGDDGFD  | HEISAFFPAN  |
| Consensus  | -----      | ---N-----  | -S--K----R | ---H-D---D  | -E-SAFFPAN  |
|            | 401        |            |            |             | 450         |
| Cf_nSMase2 | LDFLCLQEVF | DKRAAAKLKD | QLHGYFEYIL | YDVG VYGCQG | CCS.FKFLNS  |
| Am_nSMase2 | LDFLCLQEVF | DKRAAAKLKD | QLHGYFEYIL | YDVG VYGCQG | CCS.FKCLNS  |
| Bt_nSMase2 | LDFLCLQEVF | DKRAAAKLKD | QLHSYFEYIL | YDVG VYGCHG | CCS.FKCLNS  |
| Mm_nSMase2 | LDFLCLQEVF | DKRAAAKLKE | QLHGYFEYIL | YDVG VYGCHG | CCN.FKCLNS  |
| Rn_nSMase2 | LDFLCLQEVF | DKRAAAKLKE | QLHGYFEYIL | YDVG VYGCHG | CCN.FKCLNS  |
| Pt_nSMase2 | LDFLCLQEVF | DKRAATKLKE | QLHGYFEYIL | YDVG VYGCQG | CCS.FKCLNS  |
| Hs_nSMase2 | LDFLCLQEVF | DKRAATKLKE | QLHGYFEYIL | YDVG VYGCQG | CCS.FKCLNS  |
| Cj_nSMase2 | LDFLCLQEVF | DKRAATKLKD | QLHGYFEYIL | YDVG VYGCQG | CCS.FKCLNS  |
| Oc_nSMase2 | LDFLCLQEVF | DKRAAAKLKD | QLHGYFEYIL | YDVG VYGCHG | CCG.FKFLNS  |
| Xl_nSMase2 | LDFLCLQEVF | DKRAAEKLKE | QLHYFFEYVL | YDVG VYSCHG | CCG.FKFLNS  |
| Gg_nSMase2 | LDFLCLQEVF | DKRAAEKLKE | QLHHYFEYIV | YDVG VYGCHA | CCS.FK FVNS |
| Dr_nSMase2 | LDFLCLQEVF | DRRAADRLRR | QLHRYFPFVL | SDVGRYGWKG  | CCSRFKFLNS  |
| Consensus  | LDFLCLQEVF | D-RAA--L-- | QLH-YF---- | -DVG-Y----  | CC--FK--NS  |

Supplemental figure 4A (cont'd)



|            |            |            |            |            |            |
|------------|------------|------------|------------|------------|------------|
|            | 451        |            |            |            | 500        |
| Cf_nSMase2 | GLFFASRYPI | MDVAYHCYPN | GRRSDGLASK | GALFLKVQVG | STPQDQRIVG |
| Am_nSMase2 | GLFFASRYPI | MDVAYHCYPN | GRRSDGLASK | GALFLKVQVG | STPQDQRIVG |
| Bt_nSMase2 | GLFFASRYPI | MDVAYHCYPN | GRFSDSLASK | GALYLKVQVG | STPQDQRIVG |
| Mm_nSMase2 | GLFFASRYPV | MDVAYHCYPN | GCSFDALASK | GALFLKVQVG | STPQDQRIVG |
| Rn_nSMase2 | GLFFASRYPV | MDVAYHCYPN | GCSFDALASK | GALFLKVQVG | STPQDQRIVG |
| Pt_nSMase2 | GLLFASRYPI | MDVAYHCYPN | KCNDDALASK | GALFLKVQVG | STPQDQRIVG |
| Hs_nSMase2 | GLLFASRYPI | MDVAYHCYPN | KCNDDALASK | GALFLKVQVG | STPQDQRIVG |
| Cj_nSMase2 | GLLFASRYPI | MDVAYHCYPN | KCNDDALASK | GALFLKVQVG | STPQDQRIVG |
| Oc_nSMase2 | GLFFASRYPV | MDVAYHCYPN | GRGFDNLASK | GALFLKVQVG | STPQDQRIVG |
| Xl_nSMase2 | GLLFASRYPI | LDATYHCYPN | GRGIDALAAK | GALFIKVQVG | TPPQDQRIVG |
| Gg_nSMase2 | GLLFASRYPV | MDAAYHCYPN | GKGTDSLASK | GALFLKVQVG | STPQDQRIVG |
| Dr_nSMase2 | GLLLASRYPI | LDAHYECPN  | GRSEDALAAK | GVLFAKVQVG | SSAQDQRVVG |
| Consensus  | GL--ASRYP- | -D--Y-C-PN | ----D-LA-K | G-L--KVQVG | ---QDQR-VG |

|            |            |            |            |            |            |
|------------|------------|------------|------------|------------|------------|
|            | 501        |            |            |            | 550        |
| Cf_nSMase2 | YISCTHLHAL | PEDSAIRCEQ | LDLLQDWLAD | FRKSTSSSST | ANP..EELVA |
| Am_nSMase2 | YISCTHLHAL | PEDSAIRCEQ | LDLLQDWLAD | FRKSTSSSST | ANP..EELVA |
| Bt_nSMase2 | YISCTHLHAL | SESDIRCEQ  | LNMLQDWLAD | FRKSTSSSSA | ANP..EELVA |
| Mm_nSMase2 | YIACTHLHAP | PEDSAVRCEQ | LDLLQDWLAD | FRKSTSSTST | ANP..EELVV |
| Rn_nSMase2 | YIACTHLHAP | PEDSAIRCEQ | LDLLQDWLAD | FRKSTSSTST | ANP..EELVV |
| Pt_nSMase2 | YIACTHLHAP | QEDSAIRCGQ | LDLLQDWLAD | FRKSTSSSSA | ANP..EELVA |
| Hs_nSMase2 | YIACTHLHAP | QEDSAIRCGQ | LDLLQDWLAD | FRKSTSSSSA | ANP..EELVA |
| Cj_nSMase2 | YIACTHLHAP | QEDSAIRCGQ | LDLLQDWLAD | FRKSTSSSSA | ANP..EELVA |
| Oc_nSMase2 | YIACTHLHAP | PEDSAVRCEQ | LDLLQDWLAE | FRKSTSSSST | ANP..EELVA |
| Xl_nSMase2 | YISCTHLHAL | AGDAVTRCEQ | LDMLQEWVSE | FRKSTSSSSA | ANP..EELVA |
| Gg_nSMase2 | YISCTHLQAI | AGDTTVRCEQ | LDMLQDWLSE | FRKSTSSSST | ANP..EELVA |
| Dr_nSMase2 | YITCTHLHAI | EGDAAVRCEQ | LDMLLEWGAE | FRRVTSCPAD | EEKVLEDQVA |
| Consensus  | YI-CTHL-A- | --D---RC-Q | L--L--W--- | FR--TS---- | -----E--V- |

|            |            |             |            |            |            |
|------------|------------|-------------|------------|------------|------------|
|            | 551        |             |            |            | 600        |
| Cf_nSMase2 | FDVICGDLNF | DNCSSDDKLE  | QQHSLFTHYK | DPCRLGPGE  | KSWAIGTLLD |
| Am_nSMase2 | FDVICGDFNF | DNCSSDDKLE  | QQHSLFTHYK | DPCRLGPGE  | KSWVIGTLLD |
| Bt_nSMase2 | FDIICGDFNF | DNCSSDDKLE  | QQHSLFTRYK | DPCRLGPGE  | KPWAIGTLLD |
| Mm_nSMase2 | FDVICGDLNF | DNCSSDDKLE  | QQHSLFTRYK | DPCRLGPGE  | KPWAIGTLLD |
| Rn_nSMase2 | FDVICGDLNF | DNCSSDDKLE  | QQHSLFTRYK | DPCRLGPGE  | KPWAIGTLLD |
| Pt_nSMase2 | FDVVCGDFNF | DNCSSDDKLE  | QQHSLFTHYR | DPCRLGPGE  | KPWAIGTLLD |
| Hs_nSMase2 | FDVVCGDFNF | DNCSSDDKLE  | QQHSLFTHYR | DPCRLGPGE  | KPWAIGTLLD |
| Cj_nSMase2 | FDVVCGDFNF | DNCSSDDKLE  | QQHSLFTHYR | DPCRLGPGE  | KPWAIGTLLD |
| Oc_nSMase2 | FDVVCGDLNF | DNCSSDDKLE  | QQHALFTRYK | DPCRLGPGE  | KPWAIGTLLD |
| Xl_nSMase2 | FDVICGDLNF | DNCSSDDKLE  | QQHSLFTHYK | DPCRLSPGEE | KPWAIGTLLD |
| Gg_nSMase2 | FDVICGDLNF | DNCSSDDKLE  | QQHSLFTHYK | DPCRLGPGE  | KPWAIGTLLD |
| Dr_nSMase2 | FDVILGDLNF | DNCSSDDKLE  | QQHSLFTHYK | DPCRLGPGE  | KPWALGTLYD |
| Consensus  | FD---GD-NF | DNCSS--DKLE | QQH-LFT-Y- | DPCR--PGE- | K-W--GT-LD |

Supplemental figure 4A (cont'd)

|            |            |            |            |            |             |
|------------|------------|------------|------------|------------|-------------|
|            | 601        |            |            |            | 650         |
| Cf_nSMase2 | TDNLYDEEVC | TPDNLQKVLE | SEEGRREYLA | FPTSKSPGAG | QKGRKDLLKG  |
| Am_nSMase2 | TDNLYDEEVC | TPDNLQKVLE | SEEGRREYLA | FPTSKSPGAG | QKGRKDLLKG  |
| Bt_nSMase2 | QDGLYDEEVC | TPDNLQKVLE | SEEGRREYLA | FPTSKSPGGG | QKGRKELLKG  |
| Mm_nSMase2 | TNGLYDEDVC | TPDNLQKVLE | SEEGRREYLA | FPTSKSPGAG | QKGRKDLLKG  |
| Rn_nSMase2 | INGLYDEDVC | TPDNLQKVLE | SEEGRREYLA | FPTSKSPGAG | QKGRKDLLKG  |
| Pt_nSMase2 | TNGLYDEDVC | TPDNLQKVLE | SEEGRREYLA | FPTSKS..SG | QKGRKELLKG  |
| Hs_nSMase2 | TNGLYDEDVC | TPDNLQKVLE | SEEGRREYLA | FPTSKS..SG | QKGRKELLKG  |
| Cj_nSMase2 | TNGLYDEDVC | TPDNLQKVLE | SEEGRREYLA | FPTSKS..SG | QKGRKELLKG  |
| Oc_nSMase2 | INGLYDEDAC | TPDNLQKVLE | SEEGRREYLA | FPTSKSPGGG | QKGRKDLLKG  |
| Xl_nSMase2 | PEGLYDEEVC | TPDNLQKVLE | NEEGRKEYIV | YPTSKNHCPN | QKGRKVP LKG |
| Gg_nSMase2 | PEGLYDEEVF | TPDNLQKVLE | SEEGRKGYLV | YPTSKNHSSS | QKGRKASLKG  |
| Dr_nSMase2 | TSGIYDEEVS | SPESLQKVM  | NEEGRKEYLV | FPTSKNHCPN | QKGRKIPLKG  |
| Consensus  | ----YDE--- | -P--LQKV-E | -EEGR--Y-- | -PTSK----- | QKGRK--LKG  |

|            |            |            |            |            |            |
|------------|------------|------------|------------|------------|------------|
|            | 651        |            |            |            | 700        |
| Cf_nSMase2 | NGRRIDYILY | AEEGLWPDWK | AEVEEFSFIT | QLSGLTDHLP | VAMRLMVSAG |
| Am_nSMase2 | NGRRIDYMLY | AEEGLCPDWK | AEVEEFSFIT | QLSGLTDHLP | VAMRLMVSTG |
| Bt_nSMase2 | NGRRIDYMLH | GEEGLYPDWK | AEVEEFSFIT | QLSGLTDHLP | VAMRLMVSAG |
| Mm_nSMase2 | NGRRIDYMLH | AEEGLCPDWK | AEVEEFSFIT | QLSGLTDHLP | VAMRLMVSAG |
| Rn_nSMase2 | NGRRIDYMLH | AEEGLCPDWK | AEVEEFSFIT | QLSGLTDHLP | VAMRLMVSAG |
| Pt_nSMase2 | NGRRIDYMLH | AEEGLCPDWK | AEVEEFSFIT | QLSGLTDHLP | VAMRLMVSSG |
| Hs_nSMase2 | NGRRIDYMLH | AEEGLCPDWK | AEVEEFSFIT | QLSGLTDHLP | VAMRLMVSSG |
| Cj_nSMase2 | NGRRIDYMLH | AEEGLCPDWK | AEVEEFSFIT | QLSGLTDHLP | VAMRLMVSSG |
| Oc_nSMase2 | SGRRIDYMLH | AEDGLGPDWK | AEVEEFSFIT | QLSGLTDHLP | VAMRLMVSSG |
| Xl_nSMase2 | SGRRVDYMLY | TEEGLNMEWK | VDVEEYSFIT | QLAGLTDHVP | VAFRLTVSTG |
| Gg_nSMase2 | NGRRIDYMLY | TEEGLYLEWK | VEVEEFSFIT | QLAGLTDHLP | VAMRLTVSTG |
| Dr_nSMase2 | NGRRIDYILY | KEEGLHQDWK | VDIEEFSFIT | QLAGLTDHLS | VAARLVVSTG |
| Consensus  | -GRR-DY-L- | -E-GL---WK | ---EE-SFIT | QL-GLTDH-- | VA-RL-VS-G |

|            |       |
|------------|-------|
|            | 701   |
| Cf_nSMase2 | EEEEA |
| Am_nSMase2 | EEEEA |
| Bt_nSMase2 | DDEA  |
| Mm_nSMase2 | EEEEA |
| Rn_nSMase2 | EEEEA |
| Pt_nSMase2 | EEEEA |
| Hs_nSMase2 | EEEEA |
| Cj_nSMase2 | EEEEA |
| Oc_nSMase2 | EEEEA |
| Xl_nSMase2 | EEES  |
| Gg_nSMase2 | EDDP  |
| Dr_nSMase2 | EEET  |
| Consensus  | ----  |

Supplemental figure 4A (cont'd)
